# Supplementary material for: Fabrication of silica-coated magnetic nanoparticles with highly photoluminescent lanthanide probes
Source: Royal Society of Chemistry journal article supplement (doi:10.1039/b617608a), 2007-01-01
Supplement: b617608a.pdf [file b617608a.pdf]

## Electronic Supporting Information.

# Fabrication of Silica-Coated Magnetic Nanoparticles with Highly Photoluminescent Lanthanide Probes

Jungkweon Choi, Jin Chul Kim, Yong Bok Lee<sup>†</sup>, In Seon Kim, Yong Ki Park and Nam Hwi Hur<sup>‡\*</sup>

*Bio-signal Research Laboratory, Div. of Metrology for Quality Life, Korea Research Institute of Standards and Science, Yuseong P. O. Box 102, Daejeon 305-600, Korea*

<sup>†</sup>*Division of Electron Microscopic Research, Korea Basic Science Institute, Yuseong P. O. Box 41, Daejeon 305-333, Korea*

<sup>‡</sup>*Department of Chemistry, Sogang University, Seoul 121-742, Korea*

## Experimental

### 1. Fabrication of SiO<sub>2</sub>@Fe<sub>3</sub>O<sub>4</sub>/BDA Nanoparticles

The ferrite nanoparticles (NPs) were prepared on the basis of reported methods with minor modifications in water phase.<sup>1-2</sup> De-ionized water was used for all procedures. Briefly, an acidified solution of FeCl<sub>2</sub> (2g in 5mL of water) was added to another acidified solution of FeCl<sub>3</sub> (3.2g in 20mL of water) at room temperature, which was then stirred vigorously for 1 h. The ammonium hydroxide (30 mL) solution was slowly added to the mixed solution, resulting in precipitation of NPs. The precipitate was centrifuged and the supernatant was decanted to afford the ferrite particles (Fe<sub>3</sub>O<sub>4</sub>). Fe<sub>3</sub>O<sub>4</sub> NPs were washed a couple of times with methanol.

25 mg of ferrite NPs dispersed in 50 mL of water were stabilized by the addition of 1 mL of PVP (polyvinylpyrrolidone) solution. The PVP-stabilized Fe<sub>3</sub>O<sub>4</sub> NPs were separated using an aqueous acetone (water/acetone=1/10, v/v) and washed a couple of times with methanol. 80 mg of the PVP-stabilized ferrite NPs were added to a solution containing 4 mL of DI water and 20 mL of 2-propanol. In order to fabricate the silica-coated ferrite NPs, 1 mL of TEOS (tetraethylorthosilicate) and 0.5 mL of NH<sub>4</sub>OH were added to the reaction mixture and then stirred for 12 h. The silica-coated ferrite, SiO<sub>2</sub>@Fe<sub>3</sub>O<sub>4</sub>, NPs were separated by using a permanent magnet and washed a couple of times with ethanol.

The BDA (0.24 g in 30 mL of water) solution was added to the SiO<sub>2</sub>@Fe<sub>3</sub>O<sub>4</sub> NPs (20 mg) dispersed in 20 mL of water, which was then stirred for 24 h. The BDA-

anchored NPs ( $\text{SiO}_2@\text{Fe}_3\text{O}_4/\text{BDA}$ ) were isolated using a permanent magnet. Trivalent lanthanum chlorides (1 mmol) dissolved in 50 mL of water was added to the  $\text{SiO}_2@\text{Fe}_3\text{O}_4/\text{BDA}$  NPs (20 mg) dispersed in 20 mL of water, which was stirred for 12 h to make complete binding of lanthanide ions to the BDA molecule. To remove the non-binding lanthanide ions, the resulting NPs were separated by using a magnet and washed a couple of times with ethanol.

## 2. Powder X-ray diffraction (XRD)

The XRD data of the  $\text{SiO}_2@\text{Fe}_3\text{O}_4$  NPs were taken using a Rigaku RAD diffractometer equipped with Cu  $K\alpha$  radiation. All the peaks coincide well with the cubic spinel phase typical of  $\text{Fe}_3\text{O}_4$ . The XRD data also suggests that the silica shell

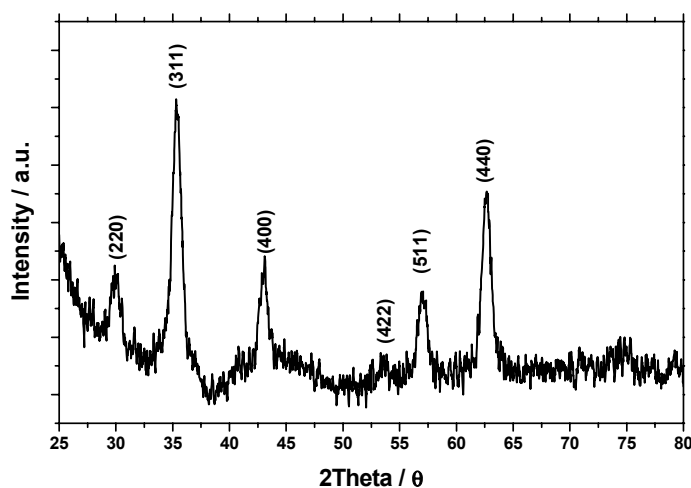

consists mainly of amorphous phase rather than polycrystalline one.

**Figure S1.** X-ray powder diffraction pattern of silica-coated ferrite NPs,  $\text{SiO}_2@\text{Fe}_3\text{O}_4$

## 3. TEM images

TEM images were obtained using a Tecchnai G2 F30 S-TWIN operated at 300 keV.

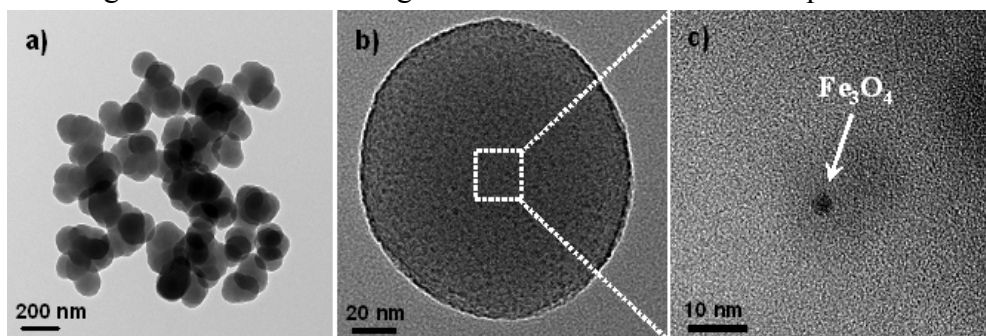

**Figure S2.** a) Representative TEM image of the silica-coated ferrite NPs,  $\text{SiO}_2@\text{Fe}_3\text{O}_4$ , b) a TEM image of one  $\text{SiO}_2@\text{Fe}_3\text{O}_4$  NP, and c) an expanded view of a high resolution

TEM image for the same NP.

#### 4. Absorption and Emission spectra

The absorption spectra were measured with a Perkin-Elmer Lambda 35 UV-Vis spectrophotometer. The steady-state fluorescence spectra were recorded with Fluorolog 3-11 spectrofluorometer (Jobin Yvon Inc.). As shown in Figure S3a, the characteristic peak corresponding to BDA is clearly observed in the two samples at the very similar position ( $\sim 295$  nm), indicating that BDA is covalently linked to the silica surface of  $\text{SiO}_2@\text{Fe}_3\text{O}_4$ . A noticeable feature is that the fluorescence spectra show distinctive difference between free BDA and bounded BDA molecules (Figure S3b). The  $\text{SiO}_2@\text{Fe}_3\text{O}_4/\text{BDA}$  NPs have their emission maximum at 420 nm, which is largely red-shifted compared to the free BDA molecules. This peak shift might be due to the conformational change of BDA molecules followed by their linkage to the oxide surface.

In order to measure the emission of  $\text{Ln}^{3+}$  ions bounded to the  $\text{SiO}_2@\text{Fe}_3\text{O}_4/\text{BDA}$ ,  $\text{SiO}_2@\text{Fe}_3\text{O}_4/\text{BDA}$  NPs (5 mg) were added to the 10 mL aqueous solution of  $\text{LnCl}_3$  and then the mixed solutions was stirred for 24 h to make complete binding of lanthanides ions to the BDA molecule. The emission spectra of  $\text{SiO}_2@\text{Fe}_3\text{O}_4/\text{BDA}/\text{Ln}^{3+}$  dispersed in DI water were measured with Fluorolog 3-11 spectrofluorometer (Jobin Yvon Inc.). The concentration of  $\text{Ln}^{3+}$  in all sample solutions was adjusted to be  $1 \times 10^{-5}$  M.

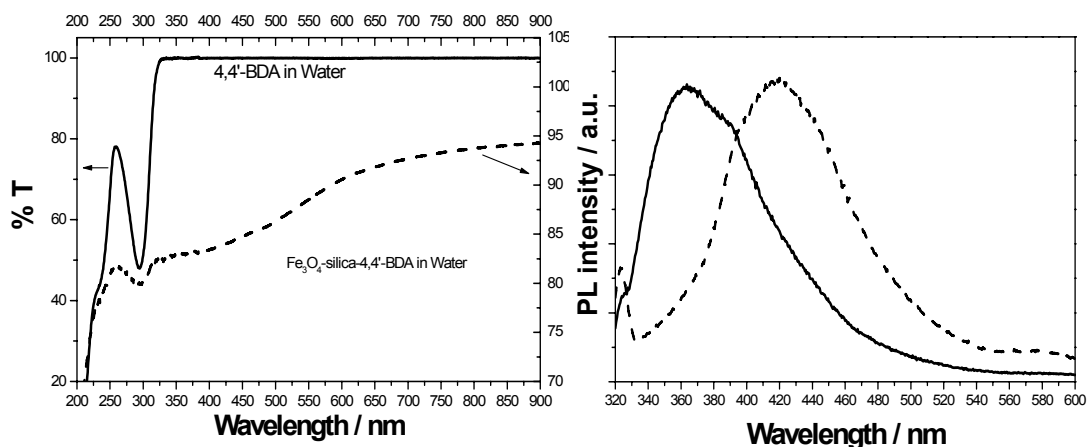

**Figure S3.** UV-visible absorption and the normalized emission spectra of BDA molecules (black) and  $\text{SiO}_2@\text{Fe}_3\text{O}_4/\text{BDA}$  NPs (red).

#### 5. Raman spectrum and magnetization data.

Raman spectrum was taken with MICRO Raman spectrometer LabRAM HR

(Horiba Jobin Yvon Inc.) using the 633 nm line of a He-Ne laser. The field-dependent magnetization measurements were carried out using a SQUID magnetometer (Quantum Design).

**References.**

1. J. Choi, J. I. Lee, Y. B. Lee, J. H. Hong, I. S. Kim, Y. K. Park, and N. H. Hur, *Chem. Phys. Lett.* 2006, **428**, 125-129.
2. T. J. Meyer, G. J. Meyer, B. W. Pfennig, J. R. Schoonover, C. J. Timson, J. F. Wall.; C. Kobusch. X. Chen, B. M. Peek, C. G. Wall, W. W. Ou, B. W. Erikson, C. A. Bignozzi, *Inorg. Chem.* 1994, **33**, 3952-3964.
